# Supplementary material for: Astrocyte activation in hindlimb somatosensory cortex contributes to electroacupuncture analgesia in acid-induced pain
Source: PubMed Central journal article supplement (PMC11021577; doi:10.3389/fneur.2024.1348038), 2024-04-03
Supplement: Table_1.pdf [file Table_1.pdf]

## Supplementary table

**Tab.1.** Treatments to different groups of rats in this study.

| Group name        | Virus injection             | Virus function       | Treatment                                                                          | Number of rats |
|-------------------|-----------------------------|----------------------|------------------------------------------------------------------------------------|----------------|
| PBS               | /                           | /                    | plantar injection of normal PBS                                                    | 11             |
| pH 6.0            | /                           | /                    | plantar injection of normal acidic PBS                                             | 12             |
| PBS+EA            | /                           | /                    | EA stimulation after plantar injection of normal PBS                               | 12             |
| pH 6.0+EA         | /                           | /                    | EA stimulation after plantar injection of acidic PBS                               | 12             |
| pH 6.0+sham EA    | /                           | /                    | sham EA stimulation after plantar injection of acidic PBS                          | 12             |
| EGFP CNO+PBS      | rAAV-GfaABC1D-EGFP          | control              | plantar injection of normal PBS after CNO administration for 30 min                | 6              |
| EGFP CNO+ pH6.0   | rAAV-GfaABC1D-EGFP          | control              | plantar injection of acidic PBS after CNO administration for 30 min                | 6              |
| Gq CNO+PBS        | rAAV-GfaABC1D-hM3D(Gq)-EGFP | astrocyte activation | plantar injection of normal PBS after CNO administration for 30 min                | 6              |
| Gq CNO+ pH6.0     | rAAV-GfaABC1D-hM3D(Gq)-EGFP | astrocyte activation | plantar injection of acidic PBS after CNO administration for 30 min                | 6              |
| Gi CNO+PBS        | rAAV-GfaABC1D-hM4D(Gi)-EGFP | astrocyte inhibition | plantar injection of normal PBS after CNO administration for 30 min                | 6              |
| Gi CNO+ pH6.0     | rAAV-GfaABC1D-hM4D(Gi)-EGFP | astrocyte inhibition | plantar injection of acidic PBS after CNO administration for 30 min                | 6              |
| EGFP CNO+pH6.0+EA | rAAV-GfaABC1D-EGFP          | control              | plantar injection of acidic PBS after CNO administration for 30 min, then apply EA | 6              |
| Gq CNO+pH6.0+EA   | rAAV-GfaABC1D-hM3D(Gq)-EGFP | astrocyte activation | plantar injection of acidic PBS after CNO administration for 30 min, then apply EA | 6              |
| Gi CNO+pH6.0+EA   | rAAV-GfaABC1D-hM4D(Gi)-EGFP | astrocyte inhibition | plantar injection of acidic PBS after CNO administration for 30 min, then apply EA | 6              |
